**Estrogen represses *Tgfb $\beta$ 1* and *Bmpr1a* expression via estrogen receptor beta in**

**MC3T3-E1 cells**

Hanliang He<sup>1</sup>, Chunqing Wang<sup>2</sup>, Qifeng Tang<sup>3</sup>, Fan Yang<sup>1</sup>, Youjia Xu<sup>1\*</sup>

<sup>1</sup>Department of Orthopaedics, the Second Affiliated Hospital of Soochow University, Suzhou  
215004, China

<sup>2</sup>Department of Orthopaedics, the Affiliated Hospital of Guizhou Medical University,  
Guiyang550004, China

<sup>3</sup>The Benq Medical Center of Suzhou, Suzhou 215000,China

\*Correspondence to: Youjia Xu

Email: xuyoujia@medmail.com.cn

Telephone: +86-0512-67783346

Fax: +86-0512-67783346

## Abstract

MC3T3-E1 is a clonal pre-osteoblastic cell line derived from newborn mouse calvaria, which is commonly used in osteoblast studies. To investigate the effects of estrogen on osteoblasts, we treated MC3T3-E1 cells with various concentrations of estrogen and assessed their proliferation. Next, we performed RNA deep sequencing to investigate the effects on estrogen target genes. *Bmpr1a* and *Tgfbr1*, important participants in the TGF-beta signaling pathway, were down-regulated in our deep sequencing results. Bioinformatics analysis revealed that estrogen receptor response elements (EREs) were present in the *Bmpr1a* and *Tgfbr1* promoters. Culturing the cells with the estrogen receptor (ER) alpha or beta antagonists 1,3-bis(4-hydroxyphenyl)-4-methyl-5-[4-(2-piperidinyloxy)phenol]-1H-pyrazole dihydrochloride (MPP) or 4-[2-phenyl-5,7-bis(trifluoromethyl)pyrazolo[1,5- $\alpha$ ]pyrimidin-3-yl]phenol (PTHPP), respectively, demonstrated that ER beta is involved in the estrogen-mediated repression of *Tgfbr1* and *Bmpr1a*. The chromatin immunoprecipitation (ChIP) results were consistent with the conclusion that E2 increased the binding of ER beta at the EREs located in the *Tgfbr1* and *Bmpr1a* promoters. Our research provides new insight into the role of estrogen in bone metabolisms.

Key words: Estrogen, Estrogen receptor beta, *Tgfbr1*, *Bmpr1a*

44

## 45 **Introduction**

46 Estrogen, a steroid hormone in the human body, plays an important role in many  
 47 physiological processes [1, 2], such as the maintenance of secondary sexual characteristics [3],  
 48 the development of neurons [4], and bone homeostasis [5]. Estrogen is critical to maintain  
 49 bone and bone density [6]. Estrogen deficiency often leads to the emergence of osteoporosis.  
 50 In postmenopausal women, estrogen secretion is markedly reduced, as is bone mineral density,  
 51 whereas the incidence of bone fractures is increased. This form of osteoporosis is called  
 52 postmenopausal osteoporosis (PO) [7]. An imbalance of osteoblasts and osteoclasts in the  
 53 bone causes osteoporosis [8]. PO has become one of the most important diseases that affects  
 54 older women, as it entails huge financial burdens for individuals and society, and reduces the  
 55 quality of life [9].

56 In 1988, Komm et al. found that ERs are expressed in osteoblasts [10], suggesting that  
 57 estrogen may have a regulatory role for osteoblasts. After the discovery of ERs on osteogenic  
 58 precursors and bone cells, an increasing number of studies has shown that estrogen has a  
 59 direct effect on osteogenesis, as well as an indirect effect that does not depend on ERs.  
 60 Kousteni et al. and others have found that estrogen can inhibit osteoblast apoptosis and  
 61 prolong osteoblast life, thereby increasing the osteogenic capacity of each osteoblast [11]. The  
 62 effect of estrogen is achieved by rapid activation of ER-mediated regulatory kinases [12]. The  
 63 lack of estrogen causes a marked increase in NF- $\kappa$ B activity in osteoblasts [13]. Estrogen  
 64 deficiency leads to an imbalance in bone metabolism between bone formation and resorption,  
 65 eventually leading to osteoporosis. As the mechanism is not yet clear, further studies on

estrogen regulation of bone metabolism and its signaling pathways are required to achieve a better understanding.

MC3T3-E1 cells are a clonal pre-osteoblastic cell line derived from newborn mouse calvarias, which is utilized in many osteoblast studies [14]. To investigate the effects of estrogen on osteoblasts, we treated MC3T3-E1 cells with various concentrations of estrogen (17- $\beta$  estradiol, E2), then monitored their proliferation and apoptosis; we then conducted RNA deep sequencing to investigate estrogen target genes. From the differentially expressed genes (DEGs) in the estrogen-treated groups compared with the DMSO control, we chose *Tgfb $\beta$ 1* and *Bmpr1a* as candidate genes, as they play important roles in the transforming growth factor beta (TGF- $\beta$ ) and bone morphogenetic protein (BMP) signaling pathways. Promoter analysis revealed estrogen receptor response elements (ERE) in the *Tgfb $\beta$ 1* and *Bmpr1a* promoter regions. Using the ER $\alpha$  or ER $\beta$  antagonists 1,3-bis(4-hydroxyphenyl)-4-methyl-5-[4-(2-piperidinylethoxy)phenol]-1H-pyrazole dihydrochloride (MPP) or 4-[2-phenyl-5,7-bis(trifluoromethyl)pyrazolo[1,5- $\alpha$ ]pyrimidin-3-yl]phenol (PTHPP), respectively, demonstrated that ER $\beta$  is involved in the repression of estrogen in the regulation of *Tgfb $\beta$ 1* and *Bmpr1a*. The chromatin immunoprecipitation (ChIP) results were consistent with the conclusion that E2 increased binding to the EREs located in the *Tgfb $\beta$ 1* and *Bmpr1a* promoters. Thus, we conclude that estrogen affects bone through negative regulation of *Tgfb $\beta$ 1* and *Bmpr1a* in MC3T3-E1 cells. Our research provides new view insight into the mechanisms of action of estrogen on osteoblasts.

## Materials & Methods

88

## 89 **Cell culture**

90 The clonal murine pre-osteoblastic cell line MC3T3-E1 was used in this study. The cells were  
 91 thawed from frozen stocks and cultured in 100-mm culture dishes in  $\alpha$ -MEM supplemented  
 92 with 10% (v/v) fetal bovine serum (Gibco), 1% (w/v) antibiotics/antimycotics (the stock  
 93 solution contained 100 U/mL penicillin G sodium, 100  $\mu$ g/mL streptomycin sulfate, and 0.25  
 94  $\mu$ g/mL amphotericin B, in saline), 1.0 mM sodium pyruvate, 0.1 mM nonessential amino  
 95 acids, and 1.5 g/L sodium bicarbonate (Gibco) at 37°C in a humidified atmosphere containing  
 96 5% (v/v) CO<sub>2</sub>. After establishing cultures from frozen cells, we sub-cultured the cells several  
 97 times. Confluent cells were detached using 0.25% trypsin in Mg<sup>2+</sup>- and Ca<sup>2+</sup>-free  
 98 phosphate-buffered saline (PBS) before use. For the treatment of MC3T3-E1 with E2, the  
 99 cells were seeded in each well of a 24- or 6-well plate with 0.5 or 2mL of culture medium.  
 100 The cells were incubated in the presence of E2 at different concentrations (0.01, 0.1, 1, and  
 101 10nM), and each concentration of E2 was maintained for three days. A group that received  
 102 DMSO served as the control.

## 103 **Cell apoptosis assay**

104 Cell apoptosis of MC3T3-E1 cells was analyzed with the TUNEL Apoptosis Detection Kit  
 105 (Beyotime). Briefly, the cells were collected two days after treatment with E2, washed with  
 106 PBS, and suspended in 500 $\mu$ l binding buffer. Then, the cells were stained for the detection of  
 107 apoptosis, according to the manufacturer's instructions. The ratio of apoptotic cells was  
 108 analyzed under an optical microscope by counting terminal deoxynucleotidyl transferase  
 109 dUTP nick end labeling (TUNEL) positive cells in six randomly selected areas.

110

## 111 **Total mRNA extraction**

112 Total cell mRNA was extracted using TRIzol®, according to manufacturer instruction  
 113 (Invitrogen). Smart Spec Plus (Bio-Rad) was used to measure the absorption at 260/280 nm to  
 114 assess the quality and quantity of the collected RNA. Lastly, the integrity of the extracted  
 115 RNA was further assessed using 1.5% agarose gel electrophoresis. Subsequently, the RNA  
 116 was transcribed to first strand cDNA using the First Strand cDNA Synthesis Kit (Takara) for  
 117 gene expression analysis.

118

## 119 **RNA sequencing library construction and sequencing**

120 We used 20µg of total RNA from the control group and the 10 nM E2-treated group for the  
 121 RNA sequencing (RNA-seq) library preparation. The collected mRNA was purified and  
 122 concentrated using oligo (dT)-conjugated magnetic beads (Invitrogen) before library  
 123 preparation. The purified mRNA was randomly cut into fragments with the fragmentation  
 124 buffer. We used the mRNA as a template, with 6-base random primers (random hexamers), to  
 125 synthesize the first strand of cDNA. We then added dNTPs, RNase H, and DNA polymerase I  
 126 to the buffer, to synthesize the second strand of cDNA. Lastly, we used AMPure® XP beads  
 127 (Beckman) to purify the synthesized cDNA. The purification of double-stranded cDNA was  
 128 performed with end repair and A-tailing. The AMPure® XP beads were used to select the size  
 129 of the fragments. Finally, the cDNA library was obtained by PCR. Using “sequencing by  
 130 synthesis” technology, we sequenced the cDNA libraries with the Illumina HiSeq2500  
 131 high-throughput sequencing platform and obtained high-quality reads. The reads and bases

sequenced by the platform were usually considered raw data, and most of them got a Q30 score for base quality.

## **Analysis of DEGs**

Gene expression has time- and space-specific characteristics, and both external stimulation and the internal environment can affect gene expression. Under two different conditions (such as the control and treatment, wild-type and mutant, different times, different organizations, etc.), genes that have significantly different expression are considered DEGs. Similarly, transcripts with significantly different expression are called differentially expressed transcripts. In bioinformatics, the process of finding differentially expressed transcripts or DEGs is known as differential expression analysis.

## **Annotation and analysis of DEGs**

The Gene Ontology (GO) database was built in 2000, and is a standard, structured biological annotation system aimed at establishing a system of standard vocabulary and knowledge of genes and their products. The GO annotation system contains three main branches: biological process, molecular function, and cellular component. We used the GO database to predict the functions of the DEGs identified in this study[15]. Enrichment analysis of the differences between samples was carried out using Top GO. Top GO directly displays the GO node and the hierarchical relationship of the DEGs. The Clusters of Orthologous Groups (COG) of proteins database is constructed on the basis of the phylogeny of bacteria, algae, and eukaryotes to classify the orthologues of gene products. To annotate the pathways of the

DEGs, it is necessary to analyze the functions of the genes. The Kyoto Encyclopedia of Genes and Genomes (KEGG) database is a major metabolic pathways database[16]. The analysis of the over-presentation of the DEGs in a pathway is important to determine the functions of the genes. In our study, COG and KEGG were used to analyze the DEGs.

### **Quantitative real-time PCR (qRT-PCR) validation**

Total cell mRNA was extracted using TRIzol®, according to manufacturer instruction (Invitrogen). We subjected 10µg of total RNA to DNaseI treatment with 1 U DNaseI (NEB). The reaction was carried out at 37°C for 10 min followed by heat inactivation at 65°C for 10 min. We then used 2.5µg of DNase-treated RNA for cDNA synthesis with reverse transcriptase (Bio-Rad), in accordance with the manufacturer's protocol. The expression of the *Gapdh* gene, which the transcriptome database indicated was stable, was used as the control for qRT-PCR experiments. Primers were designed for selected transcripts from the transcriptome database and real-time PCR was performed with SYBR®Green I master mix (TAKARA) on a CFX Connect™ Real-Time PCR Detection System (Bio-Rad). The relative expression of the transcripts was calculated using the  $\Delta \Delta C_t$  method. The primers are shown in Table 1.

### **ERα and ERβ antagonist treatment of MC3T3-E1 cells**

For the ERα and ERβ antagonist experiments, the ERα antagonist MPP and the ERβ antagonist PTHPP were added to the MC3T3-E1 cultures. After 72 h of treatment with the antagonists, the cells were harvested to quantify the target gene expression.



176

## 177 **Chip assays**

178 ChIP assays were performed according to the manufacturer's protocol (ChIP Assay Kit,  
179 Millipore). Briefly, MC3T3-E1 cells were collected after culture with or without E2,  
180 cross-linked in 2% formaldehyde at 28°C for 30 min, then treated with a 1/10 volume of 1.25  
181 M glycine to stop cross-linking, followed by PBS washes (three washes for 10 min each). We  
182 used purified rabbit or mouse IgG (Invitrogen) as a negative control and an antibody against  
183 ERβ to pull down the DNA. We performed ChIP PCR using primers flanking the ERE sites,  
184 as well as primers not flanking the ERE sites in the promoter regions of *Tgfr1* and *Bmpr1a* as  
185 controls. The primers used for the ChIP PCR are listed in Table 1.

186

## 187 **Statistics**

188 Data are presented as mean± standard deviation. Statistical differences between two groups  
189 were determined with Student's t test. Statistical differences among groups were analyzed  
190 with a one-way ANOVA followed by Student's test. All experiments were repeated at least  
191 three times, and representative experiments are shown. Differences were considered  
192 significant at P<0.05.

193

## 194 **Results**

### 195 **E2 increased MC3T3-E1 cell proliferation**

196 To determine if estrogen affects MC3T3-E1 proliferation, we treated MC3T3-E1 cells with  
197 different concentrations of E2 (0, 0.01, 0.1, 1, and 10nM E2). We then performed CCK-8

experiments. We found that MC3T3-E1 cell proliferation was unchanged in the low concentration E2-treated groups (0.01 and 0.1 nM E2) compared with that in the DMSO control groups (Fig. 1). However, in the high concentration E2 groups (1 and 10nM E2), MC3T3-E1 cell proliferation was significantly higher than in the DMSO control groups (Fig. 1). These data revealed that high concentrations of E2 promote MC3T3-E1 cell proliferation. In order to obtain robust data and explore the mechanisms of action of estrogen on MC3T3-E1 cells, we next analyzed cells treated with the highest, supraphysiological concentration of E2 (10 nM) by RNA-seq, to explore the mechanisms of action of estrogen on MC3T3-E1 cells.

### **RNA-seq and identification of DEGs**

To assess the effects of E2 on gene transcription, we used the Cuffdiff analysis module Cufflinks to analyze the differential gene expression in the samples [17]. The screening criteria for significant differences in the expression of genes are  $|\log_2\text{Ratio}| \geq 1$  and  $q\text{-value} \leq 0.05$ . Using these criteria, we identified 460 DEGs. Among those DEGs, 66 genes were up-regulated and 394 genes were down-regulated in the cells treated with 10 nM E2 treated group (Fig. 2).

### **GO analysis and KEGG pathway functional analysis of enriched DEGs**

GO is an internationally standardized gene functional classification system that provides a set of dynamically updated vocabularies to comprehensively describe the properties of genes and gene products in organisms. The most enriched GO results for the three ontologies are shown in Table 2. We found that genes that affect biological regulation, metabolic processes, development, anatomical structure development, responses to stimulation, systems

development, cell differentiation, cell communication, regulation of gene expression, and signal transduction were enriched in the DEGs (Table 2).

Multiple genes coordinate their biological functions in vivo. Pathway-based analysis enables further understanding of the biological functions of the genes. KEGG is the main public pathway database. Because we focus on the bone metabolism process, so bone metabolisms pathway was come into our view. We found that the DEGs were enriched for genes involved in the pathways for cancer, MAPK signaling, TGF- $\beta$  signaling, focal adhesion, Wnt signaling, NF- $\kappa$ B signaling, and osteoclast signaling (Table 3). The TGF- $\beta$  and Wnt signaling pathways are important in osteoblasts. Through the pathway maps, we identified alterations in the expression of *Bmpr1a*, *Tgfb1*, *Rock1*, and *sp1*, which are involved in the TGF- $\beta$  signaling pathway (Table 3). We also noted alterations in the expression of *Lrp5*, *Vangl2*, and *Rock1*, which are involved in Wnt signaling (Table 3). In the cell cycle signaling pathway, we noted alteration in the expression *Ccna2* *Stag2*, *Atr*, *Smc1a* and *Rbl1*. These data show that the effects of estrogen maybe mediated via the TGF- $\beta$  and Wnt signaling pathways in MC3T3-E1 cells.

### Confirmation of DEGs expression by qRT-PCR

We chose the candidate target genes from the bone metabolic signaling pathway. The candidate genes and their relative gene functions are listed in Fig. 3A. Among those genes, *Sp1*, *Tgfb1*, and *Rock1* belong to the TGF- $\beta$  signaling pathway; *Bmpr1a* belongs to the BMP signaling pathway; *Fos* is from the osteoclast differentiation pathway; *Lrp6* is from the Wnt signaling pathway; and *Adralb* belongs to the calcium signaling pathway. The qRT-PCR

results indicated that *Bmpr1a* (Fig. 3B), *Tgfbr1* (Fig. 3C), *Rock1* (Fig. 3D), *Lrp6*, (Fig. 3F), and *Sp1*(Fig. 3H) were down-regulated by E2 treatment, whereas *Fos* (Fig. 3E) and *Adra1b* (Fig. 3G) were up-regulated. These results confirmed the differential expression after E2 treatment of the genes identified by RNA-seq.

# **Estrogen negatively regulated gene expression via ER $\beta$**

Estrogen is an important endocrine regulator of bone metabolism, which mediates its effects via ERs [18]. ERs are transcription factors that bind EREs to activate or repress target gene expression [19]. Two mammalian ERs have been identified, ER $\alpha$  and ER $\beta$  [20]. Previous studies revealed that estrogen represses *SOST* expression via ER $\beta$  [21]. To investigate if the differential gene expression in the E2-treated MC3T3-E1 cells was mediated via ER $\beta$ , we analyzed the *Bmpr1a* and *Tgfbr1* promoters using online bioinformatics software (<http://jaspar.binf.ku.dk/>). The results identified three EREs and two EREs in the *Bmpr1a* and *Tgfbr1* gene promoters, respectively (Fig. 4A). To determine if E2 repressed the candidate genes via a particular ER, we treated MC3T3-E1 cells with 10nM E2, then added the ER $\alpha$  antagonist MPP or the ER $\beta$  antagonist PTHPP. We then performed qRT-PCR to investigate candidate gene expression. We found that E2 treatment significantly down-regulated *Bmpr1a* and *Tgfbr1*, compared to their expression in the DMSO control groups, in the MC3T3-E1 cells (Fig. 4B-D). MPP did not rescue the E2-mediated down-regulation of *Bmpr1a* and *Tgfbr1* (Fig. 4B-D). However, PTHPP treatment rescued the down-regulation of *Bmpr1a* and *Tgfbr1* (Fig. 4B-D). Rescue of the candidate target gene expression by PTHPP, but not MPP, revealed that estrogen negatively regulates gene expression via ER $\beta$ .

# **E2 increased ER $\beta$ binding to the EREs of the *Bmpr1a* and *Tgfbr1* promoters in**

## MC3T3-E1 cells

We next addressed the potential functionality of the EREs located in the *Bmpr1a* and *Tgfbr1* promoters. We performed ChIP experiments using an ER $\beta$  antibody to determine if ER $\beta$  bound to the EREs in the *Bmpr1a* and *Tgfbr1* promoters. We found that ER $\beta$  bound to ERE1 and ERE3, but not ERE2, in the *Bmpr1a* promoter (Fig. 5A). Both of the EREs located in the *Tgfbr1* promoter were bound by ER $\beta$  (Fig. 5B). To investigate if E2 treatment affected the binding of ER $\beta$  in the *Bmpr1a* and *Tgfbr1* promoters, we treated the MC3T3-E1 cells with E2 for 72h, then performed ChIP, followed by qRT-PCR. E2 treatment increased ER $\beta$  binding to ERE1 and ERE3 in the *Bmpr1a* promoter (Fig. 6C), and ERE1 and ERE2 in the *Tgfbr1* promoter (Fig. 5D). These data demonstrated that ER $\beta$  can bind to the *Bmpr1a* and *Tgfbr1* promoters, and that E2 increased ER $\beta$  binding to the EREs of the *Bmpr1a* and *Tgfbr1* promoters in MC3T3-E1 cells.

## Discussion

E2, a synthetic, exogenous estrogen that is functionally similar to endogenous estrogen, is commonly used to study the function of estrogen. MC3T3-E1 cells are a newborn mouse calvarias cell line, which is commonly used in the study of osteoblasts. ER $\alpha$  and ER $\beta$  have also been identified in this cell line, so MC3T3-E1 can be used to study the role of estrogen in the regulation of osteoblast function.

We found that estrogen increases the rates of proliferation and apoptosis in MC3T3-E1 cells. We used CCK-8 and TUNEL assays to investigate the proliferation and apoptosis of MC3T3-E1 cells after E2 treatment. We found no significant differences in the groups treated

with low concentrations of E2 after three days. However, high concentrations of E2 promoted the proliferation and apoptosis of MC3T3-E1 cells. E2-mediated increases in the proliferation of MC3T3-E1 cells have been reported in previous studies[22, 23], but we also found a slight but statistically significant increase in the number of apoptotic cells in our high concentration group, which indicated that treatment with E2 for three days was slightly toxic to MC3T3-E1 cells.

Estrogen affects many signaling pathways that are associated with bone metabolism. In both transcriptome libraries, these pathways can be identified by GO enrichment and KEGG pathway analysis of the DEGs. After E2 treatment of the MC3T3-E1 cells, cell differentiation- and cell cycle-related genes were significantly enriched among the DEGs. The involvement of these pathways can explain why E2-treated MC3T3-E1 cells undergo increased cell proliferation and apoptosis. KEGG signaling pathway analysis indicated that genes in the Wnt, MAPK, and calcium signaling pathways, and osteoclast differentiation genes, were significantly enriched among the DEGs. The enrichment of genes in these bone metabolic pathways among the DEGs demonstrated osteoblast-like differentiation of the MC3T3-E1 cells.

However, in our sequencing results, in addition to these signaling pathways, we found that the TGF- $\beta$  signaling pathway and cancer-related signaling pathways were also enriched, in contrast with the research of Zhen et al. The TGF- $\beta$  signaling pathway plays an important role in bone differentiation, especially in osteogenesis [24]. The TGF- $\beta$  superfamily of ligands includes BMPs, growth and differentiation factors, anti-müllerian hormone, activin, nodal, and the TGF- $\beta$  proteins [25]. Signaling begins with the binding of a TGF- $\beta$  superfamily ligand

to a TGF- $\beta$  type II receptor [26]. The type II receptor is a serine/threonine receptor kinase, which catalyzes the phosphorylation of the type I receptor [25]. Each class of ligand binds to a specific type II receptor. In mammals, there are seven known type I receptors and five type II receptors [25]. In our sequencing results, we found that *Tgfb1* and *Bmpr1a* levels were significantly reduced in MC3T3-E1 cells after E2 treatment, and qRT-PCR confirmed this result. *Tgfb1* is also called activin receptor-like kinase receptor (*Alk5*) [27], ALK5 protein is strongly expressed in perichondrial progenitor cells for osteoblasts, and in a thin chondrocyte layer located adjacent to the perichondrium in the peripheral cartilage [28]. Conditional knockout of the TGF- $\beta$  type I receptor *Alk5* in skeletal progenitor cells resulted in growth plates that had an abnormally thin perichondrial cell layer, as well as reduced proliferation and differentiation of osteoblasts [29].

The BMP receptors are a family of transmembrane serine/threonine kinases that include the type I receptors *Bmpr1a* and *Bmpr1b*, and the type II receptor *Bmpr2* [25, 30]. Deletion of the receptor *Bmpr1a* in osteoblast lineage cells with a *Dmp1*-Cre caused a dramatic increase in trabecular bone mass in postnatal mice, which was due to a marked increase in osteoblast numbers. In addition to increasing the osteoblast numbers in the trabecular bone. [31]. Another study revealed that conditional deletion of *Bmpr1a* in differentiated osteoclasts negatively regulates osteoclast differentiation. However, osteoblast-specific deletion of *Bmpr1a* resulted in increased bone volume with marked decreases in BFR in tibias at eight weeks of age [32, 33]. Thus, physiological *Bmpr1a* signaling in bone exerts a dual function in both restricting pre-osteoblast proliferation and promoting osteoblast activity. If the impact of decreased *Tgfb1* and *Bmpr1a* expression on MC3T3-E1 cell differentiation or increasing

osteoclast activity must be further explored.

Cancer-related signaling pathways are the second most abundantly enriched type of signaling pathway in our DEGs, and many types of cancers relative signaling are enriched, including colorectal cancer, pancreatic cancer, non-small cell lung cancer, endometrial cancer, and prostate cancer. This is consistent with clinical findings: estrogen is commonly used as a compensatory drug for estrogen loss, after long-term estrogen treatment estrogen in the initiation of many type cancer [34-36]. Although estrogen is an effective clinical treatment for postmenopausal osteoporosis and other estrogen deficiency-related diseases, its negative role cannot be ignored.

Estrogen inhibits the expression of *Tgfbr1* and *Bmpr1a* through ER $\beta$ . Previous studies have also shown that estrogen can inhibit the expression of *SOST* through ER $\beta$  [21]. To confirm that estrogen inhibits the expression of *Tgfbr1* and *Bmpr1a* through ER $\beta$ , we used ER $\alpha$ - and ER $\beta$ -specific inhibitors, and found that only the ER $\beta$  inhibitor rescued the expression of *Tgfbr1* and *Bmpr1a*. In addition, our ChIP experiment also demonstrated that ER $\beta$  binds to the *Tgfbr1* and *Bmpr1a* promoters. In mouse lung cancer tissue, estrogen was found to inhibit the expression of *Bmpr2* through ER $\alpha$  [37]. Estrogen also inhibits the activity of the TGF- $\beta$  signaling pathway by promoting Smad2/3 degradation [38]. In another study, estrogen replacement decreases the accumulation of TGF- $\beta$ 1 on vascular smooth muscle cell (VSMC) [39]. In this study, we found that the ER signaling pathway and the TGF- $\beta$  signaling pathway participate in crosstalk, and ER $\beta$  can inhibit *Tgfbr1*. Therefore, estrogen can down-regulate the expression of *Tgfbr1* and *Bmpr1a* in MC3T3-E1 cells.



## Conclusions

In conclusion, estrogen can affect bone metabolism via several bone metabolism-related signaling pathways. In MC3T3-E1 cells, estrogen appears to affect bone by negatively regulating *Tgfb $\beta$ 1* and *Bmpr1a* expression. Our research provides a new understanding of the mechanism by which estrogen acts on osteoblasts.

## Compliance with ethical standards

## Conflict of interest

The authors declare that they have no conflict of interest.

## References

- [1] Lokuge S, Frey BN, Foster JA, Soares CN, Steiner M. The rapid effects of estrogen: a mini-review. *Behavioural pharmacology*. 2010;21:465-72.
- [2] Ryan KJ. Biochemistry of aromatase: significance to female reproductive physiology. *Cancer research*. 1982;42:3342s-4s.
- [3] Tanapat P, Hastings NB, Reeves AJ, Gould E. Estrogen stimulates a transient increase in the number of new neurons in the dentate gyrus of the adult female rat. *The Journal of neuroscience : the official journal of the Society for Neuroscience*. 1999;19:5792-801.
- [4] Riggs BL, Spelsberg TC. Mechanisms of estrogen action on bone. *Postgraduate medicine*. 1989;SpecNo:13-4; discussion 33-43.

- 374 [5] Zhu BT, Conney AH. Functional role of estrogen metabolism in target cells: review and  
375 perspectives. *Carcinogenesis*. 1998;19:1-27.
- 376 [6] Khosla S, Riggs BL, Atkinson EJ, Oberg AL, Mavilia C, Del Monte F, et al. Relationship  
377 of estrogen receptor genotypes to bone mineral density and to rates of bone loss in men. *The*  
378 *Journal of clinical endocrinology and metabolism*. 2004;89:1808-16.
- 379 [7] Kanis JA. Assessment of fracture risk and its application to screening for postmenopausal  
380 osteoporosis: synopsis of a WHO report. WHO Study Group. *Osteoporosis international : a*  
381 *journal established as result of cooperation between the European Foundation for*  
382 *Osteoporosis and the National Osteoporosis Foundation of the USA*. 1994;4:368-81.
- 383 [8] Tanaka Y, Nakayamada S, Okada Y. Osteoblasts and osteoclasts in bone remodeling and  
384 inflammation. *Current drug targets Inflammation and allergy*. 2005;4:325-8.
- 385 [9] Harvey N, Dennison E, Cooper C. Osteoporosis: impact on health and economics. *Nature*  
386 *reviews Rheumatology*. 2010;6:99-105.
- 387 [10] Oursler MJ, Osdoby P, Pyfferoen J, Riggs BL, Spelsberg TC. Avian osteoclasts as  
388 estrogen target cells. *Proceedings of the National Academy of Sciences of the United States of*  
389 *America*. 1991;88:6613-7.
- 390 [11] Martin-Millan M, Almeida M, Ambrogini E, Han L, Zhao H, Weinstein RS, et al. The  
391 estrogen receptor-alpha in osteoclasts mediates the protective effects of estrogens on  
392 cancellous but not cortical bone. *Molecular endocrinology*. 2010;24:323-34.
- 393 [12] TeraTde M, Prado RF, De Marco AC, Santamaria MP, Jardini MA. The RANK/ RANKL/  
394 OPG interaction in the repair of autogenous bone grafts in female rats with estrogen  
395 deficiency. *Brazilian oral research*. 2014;28.

- 396 [13] Srivastava S, Toraldo G, Weitzmann MN, Cenci S, Ross FP, Pacifici R. Estrogen  
397 decreases osteoclast formation by down-regulating receptor activator of NF-kappa B ligand  
398 (RANKL)-induced JNK activation. The Journal of biological chemistry. 2001;276:8836-40.
- 399 [14] Robinson LJ, Yaroslavskiy BB, Griswold RD, Zadorozny EV, Guo L, Tourkova IL, et al.  
400 Estrogen inhibits RANKL-stimulated osteoclastic differentiation of human monocytes  
401 through estrogen and RANKL-regulated interaction of estrogen receptor-alpha with BCAR1  
402 and Traf6. Experimental cell research. 2009;315:1287-301.
- 403 [15] Ammann P, Rizzoli R, Bonjour JP, Bourrin S, Meyer JM, Vassalli P, et al. Transgenic  
404 mice expressing soluble tumor necrosis factor-receptor are protected against bone loss caused  
405 by estrogen deficiency. The Journal of clinical investigation. 1997;99:1699-703.
- 406 [16] Kimble RB, Srivastava S, Ross FP, Matayoshi A, Pacifici R. Estrogen deficiency  
407 increases the ability of stromal cells to support murine osteoclastogenesis via an  
408 interleukin-1 and tumor necrosis factor-mediated stimulation of macrophage  
409 colony-stimulating factor production. The Journal of biological chemistry. 1996;271:28890-7.
- 410 [17] Kimble RB, Vannice JL, Bloedow DC, Thompson RC, Hopfer W, Kung VT, et al.  
411 Interleukin-1 receptor antagonist decreases bone loss and bone resorption in ovariectomized  
412 rats. The Journal of clinical investigation. 1994;93:1959-67.
- 413 [18] Kitazawa R, Kimble RB, Vannice JL, Kung VT, Pacifici R. Interleukin-1 receptor  
414 antagonist and tumor necrosis factor binding protein decrease osteoclast formation and bone  
415 resorption in ovariectomized mice. The Journal of clinical investigation. 1994;94:2397-406.
- 416 [19] Komm BS, Terpening CM, Benz DJ, Graeme KA, Gallegos A, Korc M, et al. Estrogen  
417 binding, receptor mRNA, and biologic response in osteoblast-like osteosarcoma cells. Science.

1988;241:81-4.

[20] Kousteni S, Bellido T, Plotkin LI, O'Brien CA, Bodenner DL, Han L, et al. Nongenotropic, sex-nonspecific signaling through the estrogen or androgen receptors: dissociation from transcriptional activity. *Cell*. 2001;104:719-30.

[21] Kousteni S, Han L, Chen JR, Almeida M, Plotkin LI, Bellido T, et al. Kinase-mediated regulation of common transcription factors accounts for the bone-protective effects of sex steroids. *The Journal of clinical investigation*. 2003;111:1651-64.

[22] Chang J, Wang Z, Tang E, Fan Z, McCauley L, Franceschi R, et al. Inhibition of osteoblastic bone formation by nuclear factor-kappaB. *Nature medicine*. 2009;15:682-9.

[23] Bhalerao J, Bogers J, Van Marck E, Merregaert J. Establishment and characterization of two clonal cell lines derived from murine mandibular condyles. *Tissue & cell*. 1995;27:369-82.

[24] Schlicker A, Domingues FS, Rahnenfuhrer J, Lengauer T. A new measure for functional similarity of gene products based on Gene Ontology. *BMC bioinformatics*. 2006;7:302.

[25] Du J, Yuan Z, Ma Z, Song J, Xie X, Chen Y. KEGG-PATH: Kyoto encyclopedia of genes and genomes-based pathway analysis using a path analysis model. *Molecular bioSystems*. 2014;10:2441-7.

[26] Riddell N, Crewther SG. Integrated Comparison of GWAS, Transcriptome, and Proteomics Studies Highlights Similarities in the Biological Basis of Animal and Human Myopia. *Investigative ophthalmology & visual science*. 2017;58:660-9.

[27] Ghosh S, Chan CK. Analysis of RNA-Seq Data Using TopHat and Cufflinks. *Methods in molecular biology*. 2016;1374:339-61.

440 [28] Cooke PS, Buchanan DL, Lubahn DB, Cunha GR. Mechanism of estrogen action:  
441 lessons from the estrogen receptor-alpha knockout mouse. *Biology of reproduction*.  
442 1998;59:470-5.

443 [29] Klinge CM, Bodenner DL, Desai D, Niles RM, Traish AM. Binding of type II nuclear  
444 receptors and estrogen receptor to full and half-site estrogen response elements in  
445 vitro. *Nucleic acids research*. 1997;25:1903-12.

446 [30] Galea GL, Meakin LB, Sugiyama T, Zebda N, Sunter A, Taipaleenmaki H, et al.  
447 Estrogen receptor alpha mediates proliferation of osteoblastic cells stimulated by estrogen and  
448 mechanical strain, but their acute down-regulation of the Wnt antagonist Sost is mediated by  
449 estrogen receptor beta. *The Journal of biological chemistry*. 2013;288:9035-48.

450 [31] Kanatani M, Sugimoto T, Kano J, Fukase M, Fujita T. Effect of 17 beta-estradiol on the  
451 proliferation of osteoblastic MC3T3-E1 cells via human monocytes. *Biochemical and*  
452 *biophysical research communications*. 1991;178:866-70.

453 [32] Kanno S, Hirano S, Kayama F. Effects of phytoestrogens and environmental estrogens on  
454 osteoblastic differentiation in MC3T3-E1 cells. *Toxicology*. 2004;196:137-45.

455 [33] Shang ZZ, Li X, Sun HQ, Xiao GN, Wang CW, Gong Q. Differentially expressed genes  
456 and signalling pathways are involved in mouse osteoblast-like MC3T3-E1 cells exposed to  
457 17-beta estradiol. *International journal of oral science*. 2014;6:142-9.

458 [34] Wu M, Chen G, Li YP. TGF-beta and BMP signaling in osteoblast, skeletal development,  
459 and bone formation, homeostasis and disease. *Bone research*. 2016;4:16009.

460 [35] Shi Y, Massague J. Mechanisms of TGF-beta signaling from cell membrane to the  
461 nucleus. *Cell*. 2003;113:685-700.

462 [36] Massague J, Gomis RR. The logic of TGFbeta signaling.FEBS letters.  
463 2006;580:2811-20.

464 [37] Moustakas A. Smad signalling network.Journal of cell science. 2002;115:3355-6.

465 [38] Zhong Z, Williams BO. Integration of cellular adhesion and Wnt signaling: Interactions  
466 between N-cadherin and LRP5 and their role in regulating bone mass. Journal of bone and  
467 mineral research : the official journal of the American Society for Bone and Mineral Research.  
468 2012;27:1849-51.

469 [39] Hosseini-Farahabadi S, Geetha-Loganathan P, Fu K, Nimmagadda S, Yang HJ, Richman  
470 JM. Dual functions for WNT5A during cartilage development and in disease. Matrix  
471 biology :journal of the International Society for Matrix Biology. 2013;32:252-64.

472 [40] Matsunobu T, Torigoe K, Ishikawa M, de Vega S, Kulkarni AB, Iwamoto Y, et al. Critical  
473 roles of the TGF-beta type I receptor ALK5 in perichondrial formation and function, cartilage  
474 integrity, and osteoblast differentiation during growth plate development. Developmental  
475 biology. 2009;332:325-38.

476 [41] WozneyJM, Rosen V, Celeste AJ, Mitsock LM, WhittersMJ, KrizRW, et al. Novel  
477 regulators of bone formation: molecular clones and activities. Science. 1988;242:1528-34.

478 [42] Lim J, Shi Y, Karner CM, Lee SY, Lee WC, He G, et al. Dual function of Bmpr1a  
479 signaling in restricting preosteoblast proliferation and stimulating osteoblast activity in mouse.  
480 Development. 2016;143:339-47.

481 [43] Mishina Y, Starbuck MW, Gentile MA, Fukuda T, Kasparcova V, Seedor JG, et al. Bone  
482 morphogenetic protein type IA receptor signaling regulates postnatal osteoblast function and  
483 bone remodeling. The Journal of biological chemistry. 2004;279:27560-6.

- [44] Okamoto M, Murai J, Imai Y, Ikegami D, Kamiya N, Kato S, et al. Conditional deletion of Bmpr1a in differentiated osteoclasts increases osteoblastic bone formation, increasing volume of remodeling bone in mice. *Journal of bone and mineral research : the official journal of the American Society for Bone and Mineral Research*. 2011;26:2511-22.
- [45] Thakkar JP, Mehta DG. A review of an unfavorable subset of breast cancer: estrogen receptor positive progesterone receptor negative. *The oncologist*. 2011;16:276-85.
- [46] Russo J, Russo IH. The role of estrogen in the initiation of breast cancer. *The Journal of steroid biochemistry and molecular biology*. 2006;102:89-96.
- [47] Nelles JL, Hu WY, Prins GS. Estrogen action and prostate cancer. *Expert review of endocrinology & metabolism*. 2011;6:437-51.
- [48] Austin ED, Hamid R, Hemnes AR, Loyd JE, Blackwell T, Yu C, et al. BMPR2 expression is suppressed by signaling through the estrogen receptor. *Biology of sex differences*. 2012;3:6.
- [49] Ito I, Hanyu A, Wayama M, Goto N, Katsuno Y, Kawasaki S, et al. Estrogen inhibits transforming growth factor beta signaling by promoting Smad2/3 degradation. *The Journal of biological chemistry*. 2010;285:14747-55.
- [50] Selzman CH, Gaynor JS, Turner AS, Whitehill TA, Horwitz LD, Harken AH. Estrogen replacement inhibits intimal hyperplasia and the accumulation and effects of transforming growth factor beta1. *The Journal of surgical research*. 1998;80:380-5.
- [51] Wu L, Wu Y, Gathings B, Wan M, Li X, Grizzle W, et al. Smad4 as a transcription corepressor for estrogen receptor alpha. *The Journal of biological chemistry*. 2003;278:15192-200.

# Figures and Figure Legends

**Table 1** The primer of list in this paper

| Gene name     | Forward primer                  | Reverse primer                  | Note                  |
|---------------|---------------------------------|---------------------------------|-----------------------|
| <i>Sp1</i>    | TGGGTACTTCAGGGATCCAG            | TCCTTCTCCACCTGCTGTCT            | qRT-PCR               |
| <i>Adra1a</i> | GCTCCGTATCCACCGTAAAA            | TCTCTCGGGAAAACCTGAGC            | qRT-PCR               |
| <i>Lrp6</i>   | GACAGACTGGGGAGAAGTGC            | CAGTAAAGCTTCCGCTCCTG            | qRT-PCR               |
| <i>Fos</i>    | GATGTTCTCGGGTTCAACG             | CGCAAAAGTCCTGTGTGTTG            | qRT-PCR               |
| <i>Rock1</i>  | GCCCTGGTTTATGATTTGGA            | CCTCTGCCGATTACCTTTACC           | qRT-PCR               |
| <i>Tgfbr1</i> | ATTGCTGGTCCAGTCTGCTT            | TTTAAAGGTGGTGCCCTCTG            | qRT-PCR               |
| <i>Bmpr1a</i> | TCCATGGCACTGGTATGAAA            | TAGCATCATCTGGGCAGTGT            | qRT-PCR               |
| <i>Gapdh</i>  | GGGTGTGAACCACGAGAAAT            | CCTCCACAATGCCAAAGTT             | qRT-PCR               |
| <i>Tgfbr1</i> | GGTACCATTGTATCCACTGAA<br>TTCCA  | CTCGAGGGAGGACGCGGTCCA<br>TTGG   | Promoter clone        |
| <i>Tgfbr1</i> | GCTCTT ATCTTATGAA AGAC          | GAGAGATGGCTTCTGGCAGG            | ERE1 ChIP             |
| <i>Tgfbr1</i> | GTGACCGCTGGGAGCAGGAG            | TTCCCCTCTCCAAGTCCACG            | ERE2 ChIP             |
| <i>Tgfbr1</i> | CTGACTTGCT TAAGTAAGTG           | GAGCATTTTCCCCACCTGTG            | ChIP negative control |
| <i>Bmpr1a</i> | GGATCCTTCCTTTAGAACTAA<br>AGCTGG | CTCAGAGCAAGAGTCGGCGGCG<br>GTGGC | Promoter clone        |
| <i>Bmpr1a</i> | ATGCA CCTTTAAAAG<br>AACATC      | AATTGTCACCACCTCTTTTC            | ERE1 ChIP             |
| <i>Bmpr1a</i> | GGAAGAAAAGAGGT GGTGAC           | CCAGCGGCATAAGATAAGGA            | ERE2 ChIP             |
| <i>Bmpr1a</i> | CGCCGCTCCT TATCTTATGC           | TATAAGTCACATTGCATTG             | ERE3 ChIP             |
| <i>Bmpr1a</i> | CGCGTTCCAT CGCGTGCTAC           | GGGCGCCGAGCTGCTGGTGC            | ChIP negative control |



**Table2** Gene ontology enriched by differentially expression genes.

| Gene ontology enriched by differentially expressed genes (DEGs) |                                  |      |          |
|-----------------------------------------------------------------|----------------------------------|------|----------|
| GO Id                                                           | GO-term                          | Hits | P-value  |
| GO:0065007                                                      | Biological regulation            | 216  | 0.00455  |
| GO:0008152                                                      | Metabolic process                | 180  | 2.71E-06 |
| GO:0032502                                                      | Developmental process            | 118  | 0.00265  |
| GO:0048856                                                      | Anatomical structure development | 103  | 0.00012  |
| GO:0050896                                                      | Response to stimulus             | 109  | 0.00265  |
| GO:0048731                                                      | System development               | 83   | 0.00326  |
| GO:0030154                                                      | Cell differentiation             | 73   | 9.09E-11 |
| GO:0007154                                                      | Cell communication               | 73   | 1.71E-06 |
| GO:0010468                                                      | Regulation of gene expression    | 98   | 0.00104  |
| GO:0007165                                                      | Signal transduction              | 62   | 9.34E-07 |

**Table 3** KEGG pathway enriched by differentially expression genes.

| Pathway ID | Pathway Terms                | Hits Genes                                                                  | P-value     |
|------------|------------------------------|-----------------------------------------------------------------------------|-------------|
| ko05200    | Pathways in cancer           | <i>Kras, Cul2, Appl1, Chuk, Hif1a, Msh2, Mecom, Birc2, Ccna2, Fgf5, Fos</i> | 0.001764262 |
| ko04350    | TGF-beta signaling pathway   | <i>Sp1, Inhba, Tgfbr1a, Rbl1, Rock1, Sp1, Bmp1ra</i>                        | 0.004798816 |
| ko04010    | MAPK signaling pathway       | <i>Kras, Chuk, Rasa1, Tgfbr1a, Mecom, Rasa2, Fgf5, Fos</i>                  | 0.01030574  |
| ko04510    | Focal adhesion               | <i>Pdpk1, Vav3, Arhgap5, Birc2, Rock1, Actn2</i>                            | 0.01144867  |
| ko04310    | Wnt signaling pathway        | <i>Lrp6, Vangl2, Rock1</i>                                                  | 0.01263819  |
| ko04064    | NF-kappa B signaling pathway | <i>Chuk, Birc2</i>                                                          | 0.01721087  |
| ko04380    | Osteoclast differentiation   | <i>Chuk, Fos, Tgfbr1a</i>                                                   | 0.0313562   |
| ko04810    | Cell cycle                   | <i>Atr, Smc1a, Rbl1, Ccna2, Stag1,</i>                                      | 0.04867427  |

**Figure 1**

The effects of estrogen on MC3T3-E1 proliferation. MC3T3-E1 cells were treated with different concentrations of E2, then subjected to analysis with a CCK-8 assay. Student's t-test. \*, P<0.05; \*\*P<0.01.

**Figure 2**

The RNA-seq identified DEGs. The screening criteria to identify significant differences in the expression of genes are  $|\log_2 \text{Ratio}| \geq 1$  and  $q\text{-value} \leq 0.05$ .

**Figure 3**

Confirmation of the mRNA levels of the DEGs by qRT-PCR. We treated MC3T3-E1 cells

with 10 nM E2, then extracted total RNA for qRT-PCR. (A) The candidate genes involved in bone metabolism. (B) The expression level of *Bmpr1a*. (C) The expression level of *Tgfb1*. (D) The expression level of *Rock1*. (E) The expression level of *Fos*. (F) The expression level of *Lrp6*. (G) The expression level of *Adralb*. (H) The expression level of *Sp1*. Three independent experiments were conducted. Student's t-test was performed. \*,  $P < 0.05$ ; \*\*,  $P < 0.01$ .

#### Figure 4

Estrogen negatively regulated gene expression via ER $\beta$ . (A) Promoter analysis for *Bmpr1a*, *Tgfb1*, and *Lrp6*. T. MC3T3-E1 cells were treated with 10nM E2, and 0.1 $\mu$ M MPP or 0.1 $\mu$ M PTHPP, then candidate target gene mRNA levels were quantified via qRT-PCR. (B) The expression level of *Bmpr1a* under different treatment conditions. (C) The expression level of *Tgfb1* under different treatment conditions. Three independent experiments were conducted. Student's t test was performed. \*,  $P < 0.05$ ; \*\*,  $P < 0.01$ ; NS, not significant.

#### Figure 5

E2 increased ER $\beta$  binding to the EREs located in the *Bmpr1a* and *Tgfb1* promoters in MC3T3-E1 cells. We performed ChIP experiments on MC3T3-E1 cells using an ER $\beta$  antibody. (A) ER $\beta$  binding to the ERE1 and ERE3, but not ERE2, located in the *Bmpr1a* promoter. (B) ER $\beta$  binding to the ERE1 and ERE2 located in the *Tgfb1* promoter. We performed qRT-PCR after ChIP on cells treated with E2. (C) E2 increased ER $\beta$  binding to the *Bmpr1a* promoter. (D) E2 increased ER $\beta$  binding to the *Tgfb1* promoter. Three independent experiments were conducted. Student's t-test was performed. \*,  $P < 0.05$ ; \*\*,  $P < 0.01$ .

#### Figure 1

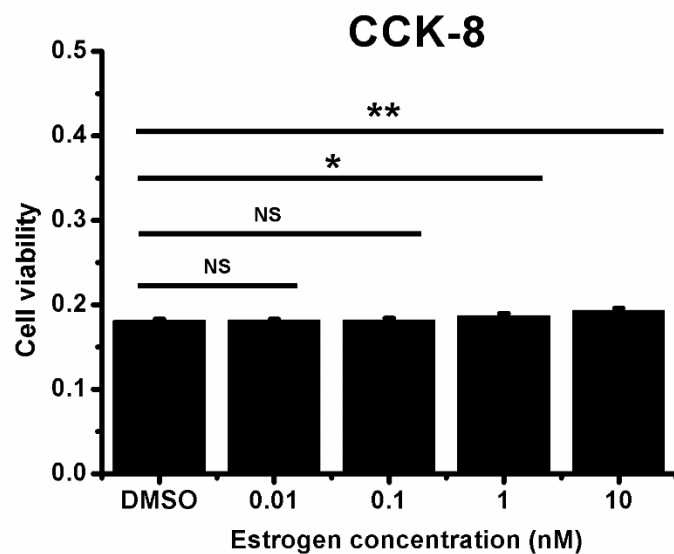

544

545 Figure 2

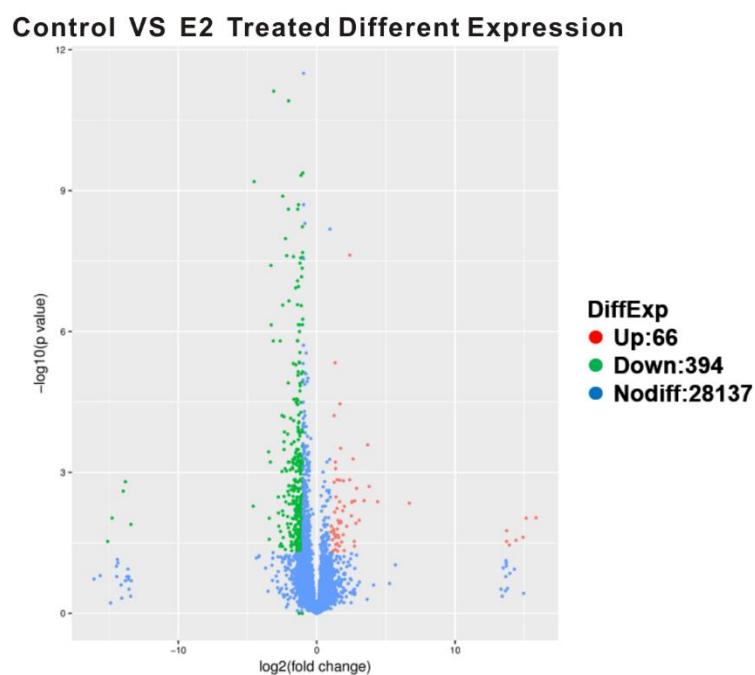

546

547

548 Figure 3

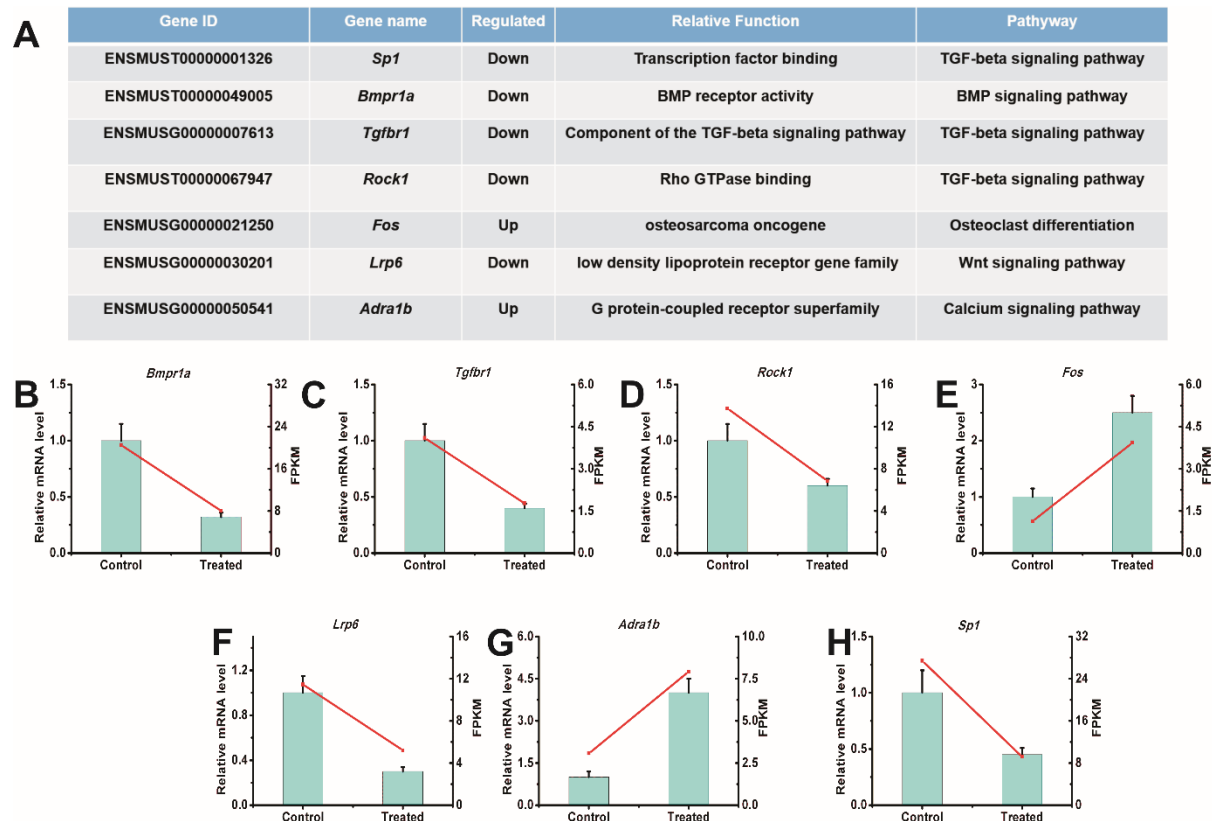

Figure 4

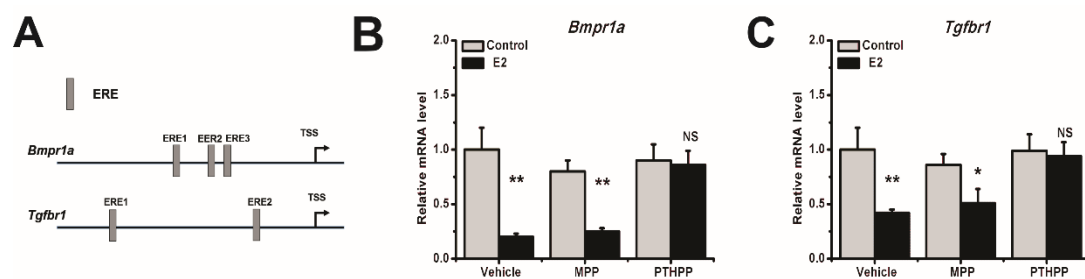

Figure 5

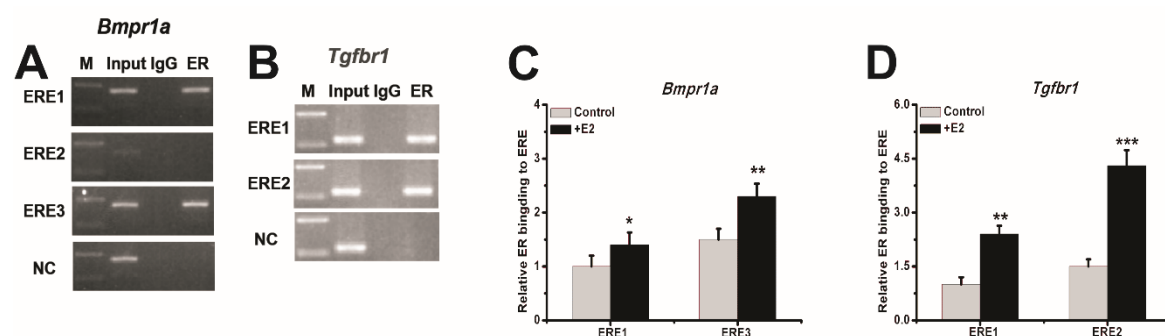

Source: http://www.biorxiv.org/content/10.1101/170084v1.full.pdf
